# Supplementary material for: Preparation and application of sunlight absorbing ultra-black carbon aerogel/graphene oxide membrane for solar steam generation systems
Source: Royal Society of Chemistry journal article supplement (doi:10.1039/d0ra07522a), 2020-01-01
Supplement: d0ra07522a1.pdf [file d0ra07522a1.pdf]

Electronic Supplementary Information

**Preparation and Application of Sunlight Absorbing  
Ultra-black Carbon Aerogel/Graphene Oxide  
Membrane for Solar Steam Generation Systems**

Mahsa Mohsenpour<sup>a</sup>, Siamak Motahari<sup>\*a</sup>, Fariba Tajabadi<sup>\*b</sup>, Mohammad Najafi<sup>a</sup>

<sup>a</sup>School of Chemical Engineering, College of Engineering, University of Tehran, Tehran, Iran

<sup>b</sup>Department of Nanotechnology and Advanced Materials, Materials and Energy Research  
Center, Alborz, Iran

\*E-mail: [smotahari@ut.ac.ir](mailto:smotahari@ut.ac.ir)

\*E-mail: [f.tjabadi@merc.ac.ir](mailto:f.tjabadi@merc.ac.ir)

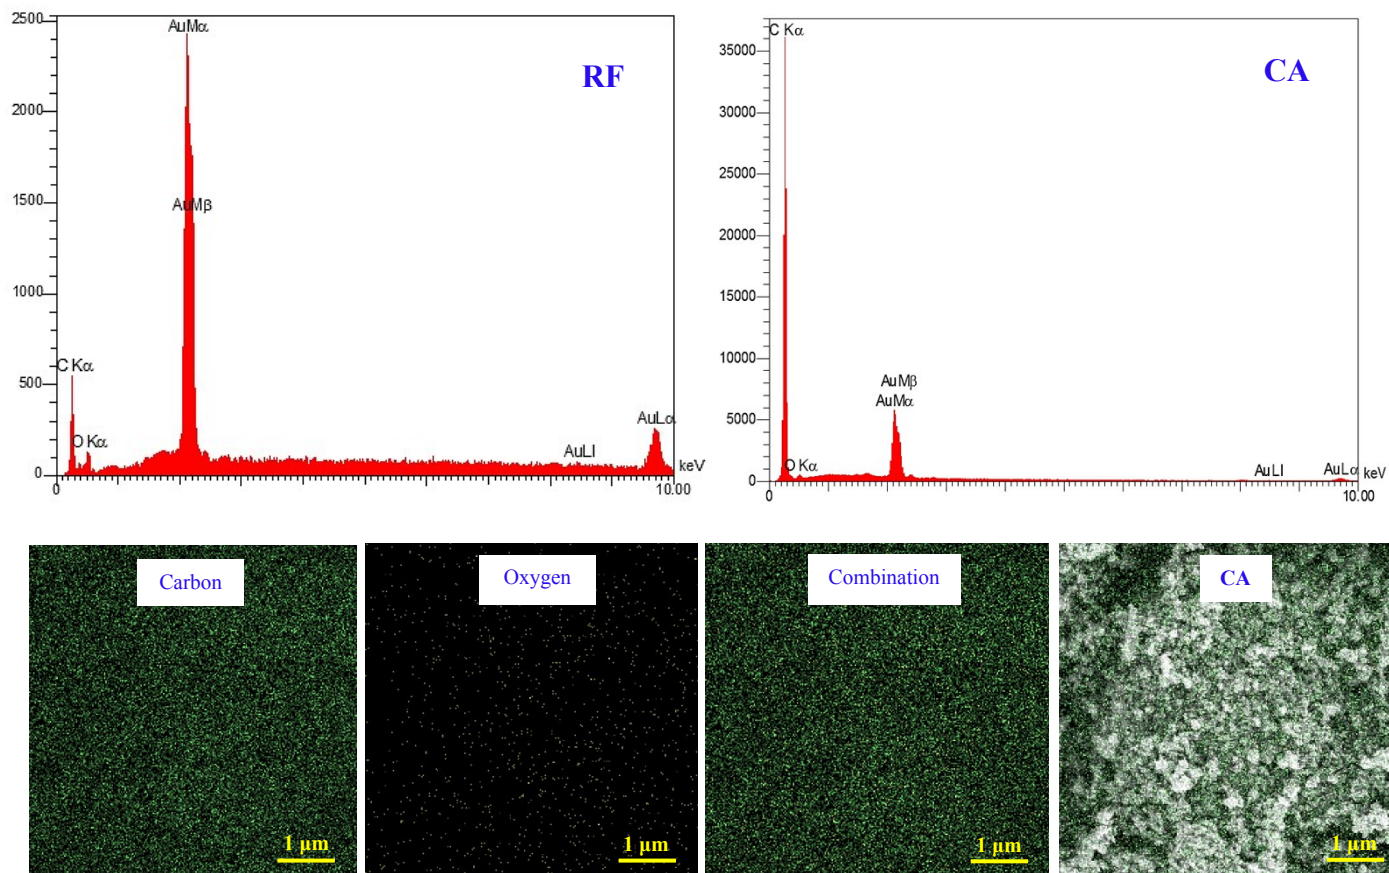

Fig. S1 EDS spectra of RF aerogel and CA powder and EDS mapping images of C and O elements for CA powder.

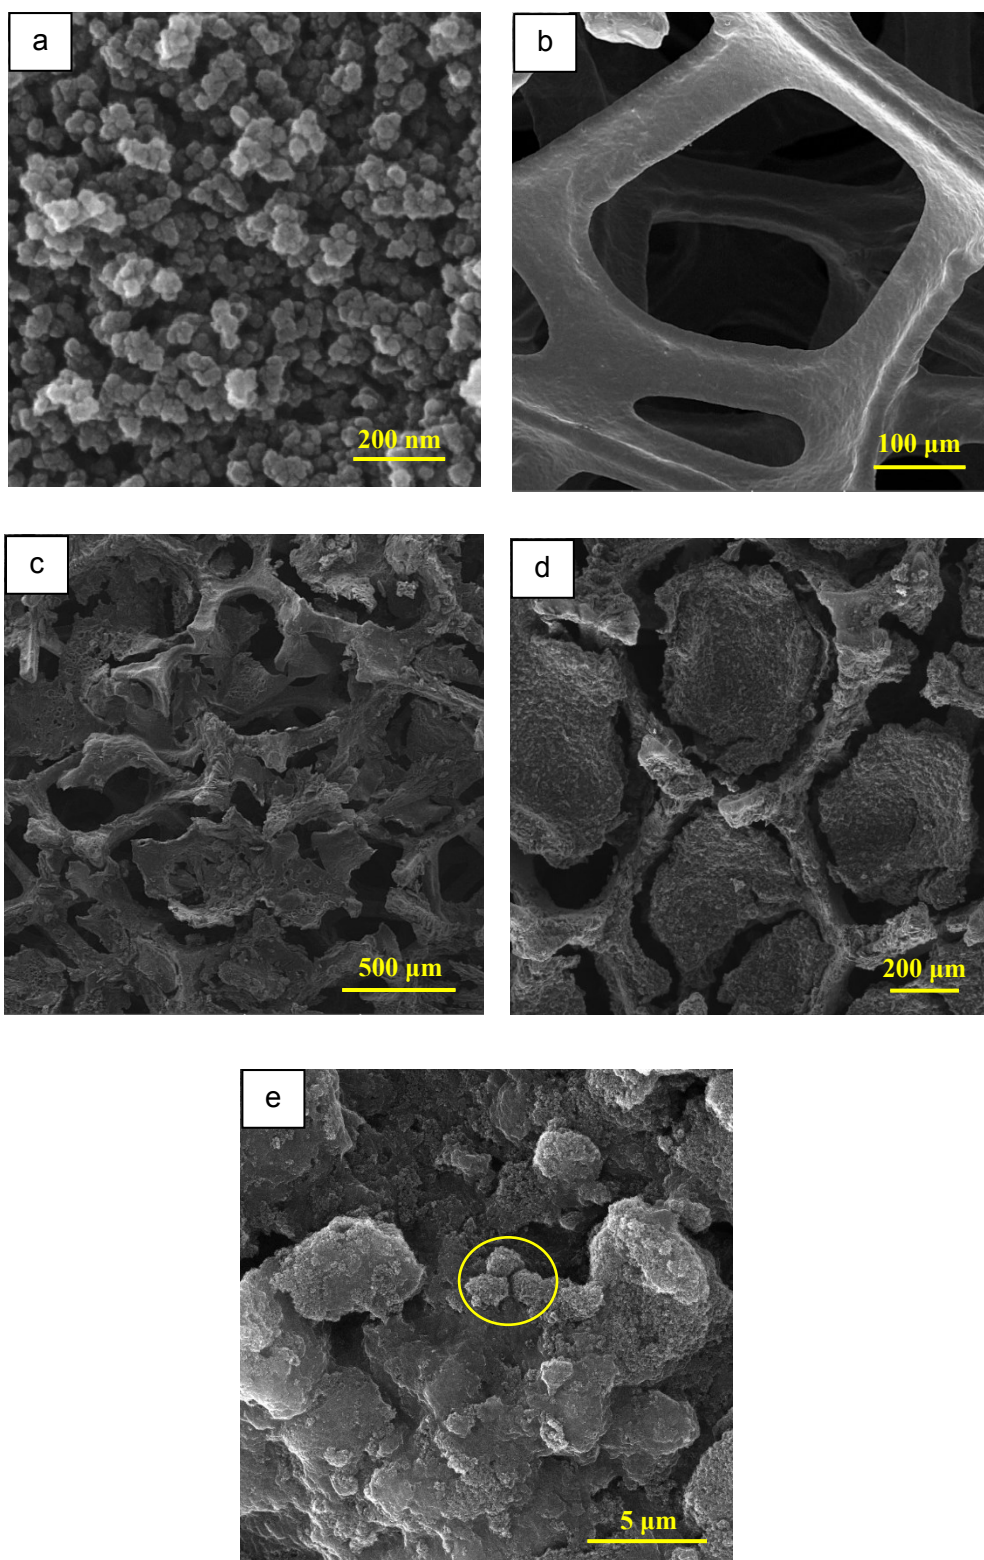

**Fig. S2** SEM micrographs of a) CA powder, b) CF, c) MCF, d) CA3@MCF and e) CA3@Paper.

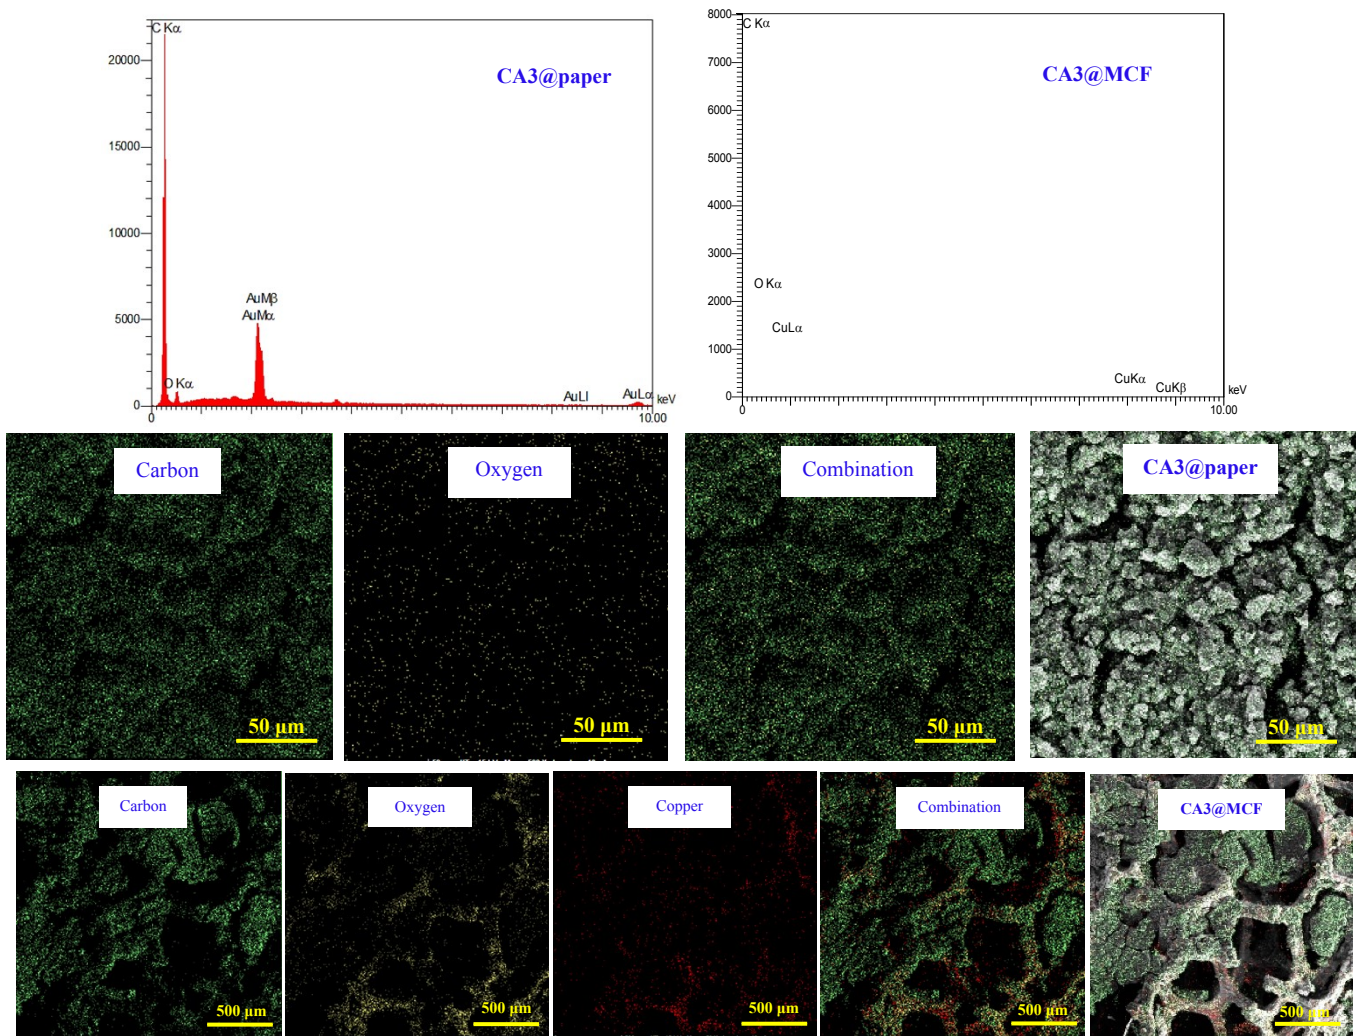

**Fig. S3.** EDS spectra and EDS mapping images of CA3@paper and CA3@MCF membranes.

Au peak is due to the coating of the samples prior to analysis.

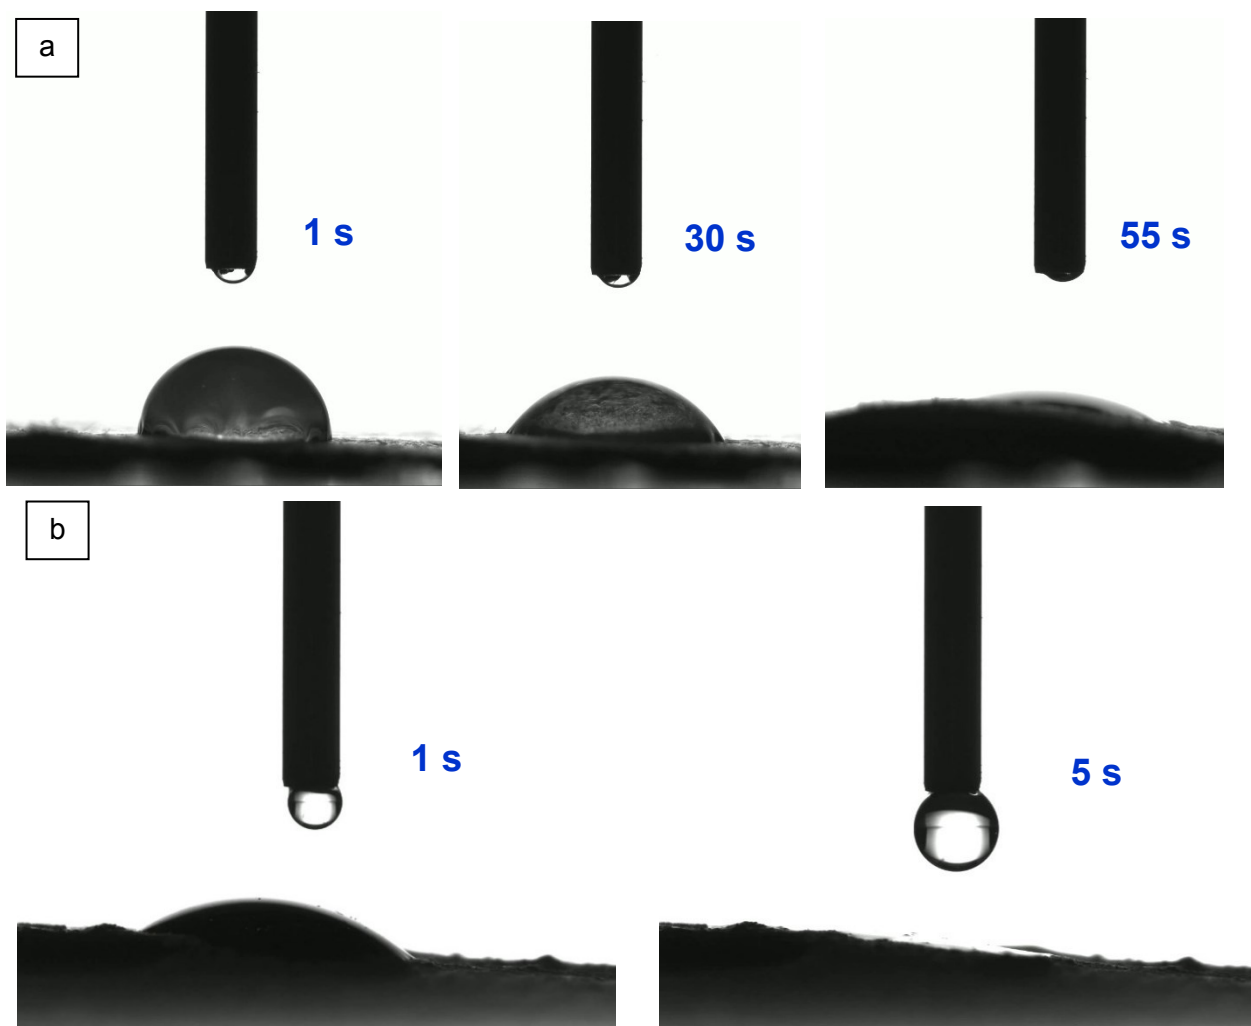

**Fig. S4** The water contact angle of a) paper substrate and b) CA3@paper absorbent.
